# Supplementary material
Source: HighWire-hosted journal article supplement (https://www.cancerbiomed.org/content/17/3/740)
Supplement: media-1 [file media-1.pdf]

## Supplementary materials

**Supplementary Table S1** The expression of genes in the Wnt/ $\beta$ -catenin pathway at the transcriptional level in CNE1-shRNA-FASN and its parental cell line (CNE1)

Continued

| Well | Fluor | Content | Target   | Sample <sup>b</sup> | Threshold cycle (C(t)) |
|------|-------|---------|----------|---------------------|------------------------|
| A01  | FAM   | Unkn    | 18S      | 1                   | 14.84                  |
| A02  | FAM   | Unkn    | GAPDH    | 1                   | 19.52                  |
| A03  | FAM   | Unkn    | HPRT1    | 1                   | 26.82                  |
| A04  | FAM   | Unkn    | GUSB     | 1                   | 27.06                  |
| A05  | FAM   | Unkn    | APC      | 1                   | 27.10                  |
| A06  | FAM   | Unkn    | AXIN1    | 1                   | 27.88                  |
| A07  | FAM   | Unkn    | AXIN2    | 1                   | 32.27                  |
| A08  | FAM   | Unkn    | BTRC     | 1                   | 29.31                  |
| A09  | FAM   | Unkn    | CSNK1A1  | 1                   | 28.04                  |
| A10  | FAM   | Unkn    | CSNK1D   | 1                   | 26.30                  |
| A11  | FAM   | Unkn    | CSNK1G1  | 1                   | 29.64                  |
| A12  | FAM   | Unkn    | CSNK1G2  | 1                   | 39.49                  |
| B01  | FAM   | Unkn    | CSNK1G3  | 1                   | 27.85                  |
| B02  | FAM   | Unkn    | CSNK2A1  | 1                   | 25.84                  |
| B03  | FAM   | Unkn    | CSNK2A2  | 1                   | 29.28                  |
| B04  | FAM   | Unkn    | CSNK2B   | 1                   | 22.94                  |
| B05  | FAM   | Unkn    | CTNNB1   | 1                   | 25.86                  |
| B06  | FAM   | Unkn    | CTNNBIP1 | 1                   | 29.79                  |
| B07  | FAM   | Unkn    | CXXC4    | 1                   | – <sup>a</sup>         |
| B08  | FAM   | Unkn    | DACT1    | 1                   | 37.52                  |
| B09  | FAM   | Unkn    | DKK1     | 1                   | 28.52                  |
| B10  | FAM   | Unkn    | DKK2     | 1                   | – <sup>a</sup>         |
| B11  | FAM   | Unkn    | DKK3     | 1                   | 35.00                  |
| B12  | FAM   | Unkn    | DKK4     | 1                   | – <sup>a</sup>         |
| C01  | FAM   | Unkn    | DVL1     | 1                   | 31.50                  |
| C02  | FAM   | Unkn    | DVL2     | 1                   | 29.35                  |
| C03  | FAM   | Unkn    | DVL3     | 1                   | 25.52                  |
| C04  | FAM   | Unkn    | EP300    | 1                   | 28.06                  |
| C05  | FAM   | Unkn    | FBXW11   | 1                   | 29.46                  |
| C06  | FAM   | Unkn    | FGF4     | 1                   | – <sup>a</sup>         |
| C07  | FAM   | Unkn    | FOXN1    | 1                   | 37.35                  |
| C08  | FAM   | Unkn    | FRAT1    | 1                   | 31.68                  |
| C09  | FAM   | Unkn    | FRAT2    | 1                   | 26.85                  |
| C10  | FAM   | Unkn    | FRZB     | 1                   | – <sup>a</sup>         |
| C11  | FAM   | Unkn    | FZD1     | 1                   | 31.11                  |
| C12  | FAM   | Unkn    | FZD10    | 1                   | 32.76                  |
| D01  | FAM   | Unkn    | FZD2     | 1                   | 30.06                  |
| D02  | FAM   | Unkn    | FZD3     | 1                   | 30.52                  |
| D03  | FAM   | Unkn    | FZD4     | 1                   | 28.18                  |
| D04  | FAM   | Unkn    | FZD6     | 1                   | 25.94                  |
| D05  | FAM   | Unkn    | FZD7     | 1                   | 30.19                  |
| D06  | FAM   | Unkn    | FZD8     | 1                   | 31.62                  |
| D07  | FAM   | Unkn    | FZD9     | 1                   | 35.70                  |
| D08  | FAM   | Unkn    | GSK3A    | 1                   | 28.76                  |
| D09  | FAM   | Unkn    | GSK3B    | 1                   | 26.60                  |
| D10  | FAM   | Unkn    | KREMEN1  | 1                   | 29.17                  |
| D11  | FAM   | Unkn    | KREMEN2  | 1                   | 35.11                  |
| D12  | FAM   | Unkn    | LEF1     | 1                   | 28.62                  |
| E01  | FAM   | Unkn    | LRP5     | 1                   | 25.48                  |
| E02  | FAM   | Unkn    | LRP6     | 1                   | 27.65                  |
| E03  | FAM   | Unkn    | MYC      | 1                   | 23.54                  |
| E04  | FAM   | Unkn    | NKD1     | 1                   | 33.06                  |
| E05  | FAM   | Unkn    | NLK      | 1                   | 31.40                  |
| E06  | FAM   | Unkn    | CBY1     | 1                   | 29.03                  |
| E07  | FAM   | Unkn    | PITX2    | 1                   | 38.53                  |
| E08  | FAM   | Unkn    | PORCN    | 1                   | 28.53                  |
| E09  | FAM   | Unkn    | PPP2CA   | 1                   | 25.51                  |
| E10  | FAM   | Unkn    | PPP2R1A  | 1                   | 26.37                  |
| E11  | FAM   | Unkn    | PYGO1    | 1                   | – <sup>a</sup>         |
| E12  | FAM   | Unkn    | PYGO2    | 1                   | 27.92                  |
| F01  | FAM   | Unkn    | RHOU     | 1                   | 35.92                  |
| F02  | FAM   | Unkn    | SENP2    | 1                   | 28.01                  |
| F03  | FAM   | Unkn    | SFRP1    | 1                   | 37.59                  |
| F04  | FAM   | Unkn    | SFRP2    | 1                   | – <sup>a</sup>         |
| F05  | FAM   | Unkn    | SFRP4    | 1                   | – <sup>a</sup>         |

Supplementary Table S1 Continued

| Well | Fluor | Content | Target   | Sample <sup>b</sup> | Threshold cycle (C(t)) | Well | Fluor | Content | Target   | Sample <sup>b</sup> | Threshold cycle (C(t)) |
|------|-------|---------|----------|---------------------|------------------------|------|-------|---------|----------|---------------------|------------------------|
| F06  | FAM   | Unkn    | SFRP5    | 1                   | – <sup>a</sup>         | A05  | FAM   | Unkn    | APC      | 2                   | 31.51                  |
| F07  | FAM   | Unkn    | SLC9A3R1 | 1                   | 30.43                  | A06  | FAM   | Unkn    | AXIN1    | 2                   | 30.56                  |
| F08  | FAM   | Unkn    | TCF7     | 1                   | 32.23                  | A07  | FAM   | Unkn    | AXIN2    | 2                   | 36.12                  |
| F09  | FAM   | Unkn    | TCF7L1   | 1                   | 32.42                  | A08  | FAM   | Unkn    | BTRC     | 2                   | 31.02                  |
| F10  | FAM   | Unkn    | TCF7L2   | 1                   | 27.29                  | A09  | FAM   | Unkn    | CSNK1A1  | 2                   | 35.76                  |
| F11  | FAM   | Unkn    | TLE1     | 1                   | 29.99                  | A10  | FAM   | Unkn    | CSNK1D   | 2                   | – <sup>a</sup>         |
| F12  | FAM   | Unkn    | TLE2     | 1                   | 33.29                  | A11  | FAM   | Unkn    | CSNK1G1  | 2                   | – <sup>a</sup>         |
| G01  | FAM   | Unkn    | TLE3     | 1                   | 26.13                  | A12  | FAM   | Unkn    | CSNK1G2  | 2                   | – <sup>a</sup>         |
| G02  | FAM   | Unkn    | TLE4     | 1                   | 32.37                  | B01  | FAM   | Unkn    | CSNK1G3  | 2                   | 31.14                  |
| G03  | FAM   | Unkn    | TLE6     | 1                   | 35.79                  | B02  | FAM   | Unkn    | CSNK2A1  | 2                   | 29.13                  |
| G04  | FAM   | Unkn    | WIF1     | 1                   | – <sup>a</sup>         | B03  | FAM   | Unkn    | CSNK2A2  | 2                   | 31.22                  |
| G05  | FAM   | Unkn    | WISP1    | 1                   | – <sup>a</sup>         | B04  | FAM   | Unkn    | CSNK2B   | 2                   | 26.20                  |
| G06  | FAM   | Unkn    | WNT1     | 1                   | – <sup>a</sup>         | B05  | FAM   | Unkn    | CTNNB1   | 2                   | 27.81                  |
| G07  | FAM   | Unkn    | WNT10A   | 1                   | 38.10                  | B06  | FAM   | Unkn    | CTNNBIP1 | 2                   | 30.48                  |
| G08  | FAM   | Unkn    | WNT10B   | 1                   | 31.89                  | B07  | FAM   | Unkn    | CXXC4    | 2                   | 37.94                  |
| G09  | FAM   | Unkn    | WNT11    | 1                   | 32.22                  | B08  | FAM   | Unkn    | DACT1    | 2                   | 36.86                  |
| G10  | FAM   | Unkn    | WNT16    | 1                   | 37.70                  | B09  | FAM   | Unkn    | DKK1     | 2                   | 29.80                  |
| G11  | FAM   | Unkn    | WNT2     | 1                   | – <sup>a</sup>         | B10  | FAM   | Unkn    | DKK2     | 2                   | – <sup>a</sup>         |
| G12  | FAM   | Unkn    | WNT2B    | 1                   | 37.35                  | B11  | FAM   | Unkn    | DKK3     | 2                   | 36.61                  |
| H01  | FAM   | Unkn    | WNT3     | 1                   | – <sup>a</sup>         | B12  | FAM   | Unkn    | DKK4     | 2                   | – <sup>a</sup>         |
| H02  | FAM   | Unkn    | WNT3A    | 1                   | 37.98                  | C01  | FAM   | Unkn    | DVL1     | 2                   | 30.15                  |
| H03  | FAM   | Unkn    | WNT4     | 1                   | 36.54                  | C02  | FAM   | Unkn    | DVL2     | 2                   | 32.79                  |
| H04  | FAM   | Unkn    | WNT5A    | 1                   | 28.58                  | C03  | FAM   | Unkn    | DVL3     | 2                   | 27.74                  |
| H05  | FAM   | Unkn    | WNT5B    | 1                   | 34.74                  | C04  | FAM   | Unkn    | EP300    | 2                   | 31.65                  |
| H06  | FAM   | Unkn    | WNT6     | 1                   | 38.34                  | C05  | FAM   | Unkn    | FBXW11   | 2                   | 32.05                  |
| H07  | FAM   | Unkn    | WNT7A    | 1                   | 34.56                  | C06  | FAM   | Unkn    | FGF4     | 2                   | – <sup>a</sup>         |
| H08  | FAM   | Unkn    | WNT7B    | 1                   | 32.94                  | C07  | FAM   | Unkn    | FOXP1    | 2                   | 43.76                  |
| H09  | FAM   | Unkn    | WNT8A    | 1                   | – <sup>a</sup>         | C08  | FAM   | Unkn    | FRAT1    | 2                   | 33.74                  |
| H10  | FAM   | Unkn    | WNT8B    | 1                   | – <sup>a</sup>         | C09  | FAM   | Unkn    | FRAT2    | 2                   | 29.92                  |
| H11  | FAM   | Unkn    | WNT9A    | 1                   | 39.41                  | C10  | FAM   | Unkn    | FRZB     | 2                   | – <sup>a</sup>         |
| H12  | FAM   | Unkn    | WNT9B    | 1                   | 34.42                  | C11  | FAM   | Unkn    | FZD1     | 2                   | 32.02                  |
| A01  | FAM   | Unkn    | 18S      | 2                   | 18.65                  | C12  | FAM   | Unkn    | FZD10    | 2                   | – <sup>a</sup>         |
| A02  | FAM   | Unkn    | GAPDH    | 2                   | 22.82                  | D01  | FAM   | Unkn    | FZD2     | 2                   | 32.14                  |
| A03  | FAM   | Unkn    | HPRT1    | 2                   | 29.31                  | D02  | FAM   | Unkn    | FZD3     | 2                   | 32.85                  |
| A04  | FAM   | Unkn    | GUSB     | 2                   | 29.04                  | D03  | FAM   | Unkn    | FZD4     | 2                   | 30.40                  |

Supplementary Table S1 Continued

| Well | Fluor | Content | Target   | Sample <sup>b</sup> | Threshold cycle (C(t)) |
|------|-------|---------|----------|---------------------|------------------------|
| D04  | FAM   | Unkn    | FZD6     | 2                   | 28.19                  |
| D05  | FAM   | Unkn    | FZD7     | 2                   | 33.17                  |
| D06  | FAM   | Unkn    | FZD8     | 2                   | 32.01                  |
| D07  | FAM   | Unkn    | FZD9     | 2                   | 36.73                  |
| D08  | FAM   | Unkn    | GSK3A    | 2                   | 29.28                  |
| D09  | FAM   | Unkn    | GSK3B    | 2                   | 28.89                  |
| D10  | FAM   | Unkn    | KREMEN1  | 2                   | 33.97                  |
| D11  | FAM   | Unkn    | KREMEN2  | 2                   | 45.79                  |
| D12  | FAM   | Unkn    | LEF1     | 2                   | – <sup>a</sup>         |
| E01  | FAM   | Unkn    | LRP5     | 2                   | 28.84                  |
| E02  | FAM   | Unkn    | LRP6     | 2                   | 31.59                  |
| E03  | FAM   | Unkn    | MYC      | 2                   | 26.12                  |
| E04  | FAM   | Unkn    | NKD1     | 2                   | 35                     |
| E05  | FAM   | Unkn    | NLK      | 2                   | 33.35                  |
| E06  | FAM   | Unkn    | CBY1     | 2                   | 31.47                  |
| E07  | FAM   | Unkn    | PITX2    | 2                   | 40.02                  |
| E08  | FAM   | Unkn    | PORCN    | 2                   | 30.99                  |
| E09  | FAM   | Unkn    | PPP2CA   | 2                   | 26.98                  |
| E10  | FAM   | Unkn    | PPP2R1A  | 2                   | 26.90                  |
| E11  | FAM   | Unkn    | PYGO1    | 2                   | – <sup>a</sup>         |
| E12  | FAM   | Unkn    | PYGO2    | 2                   | – <sup>a</sup>         |
| F01  | FAM   | Unkn    | RHOA     | 2                   | 36.96                  |
| F02  | FAM   | Unkn    | SENP2    | 2                   | 29.36                  |
| F03  | FAM   | Unkn    | SFRP1    | 2                   | – <sup>a</sup>         |
| F04  | FAM   | Unkn    | SFRP2    | 2                   | 40.50                  |
| F05  | FAM   | Unkn    | SFRP4    | 2                   | – <sup>a</sup>         |
| F06  | FAM   | Unkn    | SFRP5    | 2                   | – <sup>a</sup>         |
| F07  | FAM   | Unkn    | SLC9A3R1 | 2                   | 32.83                  |
| F08  | FAM   | Unkn    | TCF7     | 2                   | 33.88                  |
| F09  | FAM   | Unkn    | TCF7L1   | 2                   | 34.59                  |
| F10  | FAM   | Unkn    | TCF7L2   | 2                   | 31.93                  |
| F11  | FAM   | Unkn    | TLE1     | 2                   | – <sup>a</sup>         |
| F12  | FAM   | Unkn    | TLE2     | 2                   | – <sup>a</sup>         |
| G01  | FAM   | Unkn    | TLE3     | 2                   | 28.27                  |
| G02  | FAM   | Unkn    | TLE4     | 2                   | 33.87                  |

| Well | Fluor | Content | Target | Sample <sup>b</sup> | Threshold cycle (C(t)) |
|------|-------|---------|--------|---------------------|------------------------|
| G03  | FAM   | Unkn    | TLE6   | 2                   | 35.48                  |
| G04  | FAM   | Unkn    | WIF1   | 2                   | – <sup>a</sup>         |
| G05  | FAM   | Unkn    | WISP1  | 2                   | – <sup>a</sup>         |
| G06  | FAM   | Unkn    | WNT1   | 2                   | 40.11                  |
| G07  | FAM   | Unkn    | WNT10A | 2                   | 36.42                  |
| G08  | FAM   | Unkn    | WNT10B | 2                   | 31.77                  |
| G09  | FAM   | Unkn    | WNT11  | 2                   | 34.89                  |
| G10  | FAM   | Unkn    | WNT16  | 2                   | 40.72                  |
| G11  | FAM   | Unkn    | WNT2   | 2                   | – <sup>a</sup>         |
| G12  | FAM   | Unkn    | WNT2B  | 2                   | – <sup>a</sup>         |
| H01  | FAM   | Unkn    | WNT3   | 2                   | 33.86                  |
| H02  | FAM   | Unkn    | WNT3A  | 2                   | – <sup>a</sup>         |
| H03  | FAM   | Unkn    | WNT4   | 2                   | 36.55                  |
| H04  | FAM   | Unkn    | WNT5A  | 2                   | 32.58                  |
| H05  | FAM   | Unkn    | WNT5B  | 2                   | 36.38                  |
| H06  | FAM   | Unkn    | WNT6   | 2                   | 37.63                  |
| H07  | FAM   | Unkn    | WNT7A  | 2                   | 33.55                  |
| H08  | FAM   | Unkn    | WNT7B  | 2                   | 32.72                  |
| H09  | FAM   | Unkn    | WNT8A  | 2                   | 37.86                  |
| H10  | FAM   | Unkn    | WNT8B  | 2                   | – <sup>a</sup>         |
| H11  | FAM   | Unkn    | WNT9A  | 2                   | 45.16                  |
| H12  | FAM   | Unkn    | WNT9B  | 2                   | 43.62                  |

<sup>a</sup>Representing those genes without amplification in the samples;  
<sup>b</sup>Sample 2 and Sample 1 separately referred to CNE1 with and without downregulating fatty acid synthase using a short hairpin RNA.

**Supplementary Table S2** Expression status of fatty acid synthase (FASN) and frizzled class receptor 10 (FZD10) in xenografts of mice

| # of mouse <sup>†</sup> | Control |       | Radiation (5 Gy) |       | EGCG (30 mg/kg) |       | Radiation (5 Gy) and EGCG (30 mg/kg) |       |
|-------------------------|---------|-------|------------------|-------|-----------------|-------|--------------------------------------|-------|
|                         | FASN    | FZD10 | FASN             | FZD10 | FASN            | FZD10 | FASN                                 | FZD10 |
| 1                       | 4       | 4     | 1                | 1     | 1               | 1     | 0                                    | 0     |
| 2                       | 4       | 4     | 0                | 0     | 0               | 0     | 0                                    | 0     |
| 3                       | 2       | 2     | 0                | 0     | 0               | 0     | 0                                    | 0     |
| 4                       | 4       | 4     | 0                | 0     | 1               | 1     | 1                                    | 1     |
| 5                       | 6       | 6     | 1                | 1     | 0               | 0     | 0                                    | 0     |

<sup>†</sup>The serial number of mice.

**Supplementary Table S3** Summary of fatty acid synthase and frizzled class receptor 10 (FZD10) expressions detected by immunohistochemistry in xenografts of CNE1-shRNA-NC cells

| No. of mice                                              | FASN |   | FZD10 |   |
|----------------------------------------------------------|------|---|-------|---|
|                                                          | +    | - | +     | - |
| Control                                                  | 5    | 0 | 5     | 0 |
| Epigallocatechin gallate (30 mg/kg)                      | 2    | 3 | 2     | 3 |
| Radiation (5 Gy)                                         | 2    | 3 | 2     | 3 |
| Radiation (5 Gy) and epigallocatechin gallate (30 mg/kg) | 1    | 4 | 1     | 4 |

**Supplementary Table S5** The correlation between fatty acid synthase (FASN) and frizzled class receptor 10 (FZD10) expression in tumors from nasopharyngeal carcinoma patients

|       |          | FASN       |            | Total | <i>P</i> |
|-------|----------|------------|------------|-------|----------|
|       |          | Negative   | Positive   |       |          |
| FZD10 | Negative | 31 (75.6%) | 10 (24.4%) | 41    | <0.001   |
|       | Positive | 19 (23.5%) | 62 (76.5%) | 81    |          |
| Total |          | 50         | 72         |       |          |

**Supplementary Table S4** The clinical pathological features of the 122 nasopharyngeal carcinoma patients

| Clinical pathological features | No. | Percentage (%) |
|--------------------------------|-----|----------------|
| Age (years)                    |     |                |
| <60                            | 96  | 78.7           |
| ≥60                            | 26  | 21.3           |
| Gender                         |     |                |
| Male                           | 91  | 74.6           |
| Female                         | 31  | 25.4           |
| N classification               |     |                |
| No                             | 18  | 14.8           |
| Yes                            | 104 | 85.2           |
| Distant metastasis             |     |                |
| No                             | 120 | 98.4           |
| Yes                            | 2   | 1.6            |

**Supplementary Table S6** Univariate and multivariate survival analysis for assessing the effect of fatty acid synthase/frizzled class receptor 10 (FZD10) expression on the overall survival in nasopharyngeal carcinoma patients

| Variate          | N  | N of events | Survival rate (%) |          |        | Multivariate survival analysis |                 |                    |
|------------------|----|-------------|-------------------|----------|--------|--------------------------------|-----------------|--------------------|
|                  |    |             | 30-month          | 60-month | P (KM) | HR                             | 95% CI          | P (Cox)            |
| FZD10 (+)        | 81 | 40          | 0.728             | 0.499    | 0.027  | 1.949                          | 0.990 to 3.837  | 0.054 <sup>a</sup> |
| FZD10 (-)        | 41 | 11          | 0.805             | 0.726    |        |                                |                 |                    |
| FASN (+)         | 72 | 37          | 0.708             | 0.476    | 0.014  | 1.969                          | 1.061 to 3.654  | 0.032 <sup>b</sup> |
| FASN (-)         | 50 | 14          | 0.820             | 0.716    |        |                                |                 |                    |
| FASN (-)FZD10(-) | 31 | 5           | 0.839             | 0.839    | 0.020  |                                |                 | 0.053 <sup>c</sup> |
| FASN (+)FZD10(-) | 10 | 6           | 0.700             | 0.350    |        | 4.916                          | 1.409 to 17.147 | 0.012 <sup>d</sup> |
| FASN (-)FZD10(+) | 19 | 9           | 0.789             | 0.521    |        | 3.265                          | 1.092 to 9.766  | 0.034 <sup>e</sup> |
| FASN (+)FZD10(+) | 62 | 31          | 0.710             | 0.494    |        | 3.337                          | 1.291 to 8.620  | 0.013 <sup>f</sup> |

<sup>a</sup>All 122 nasopharyngeal carcinoma (NPC) patients were divided into 2 groups according to FZD10 expression, namely patients with FZD10(+) and patients with FZD10(-). *P* value represented the significant difference of overall survival (OS) rate between these 2 groups. <sup>b</sup>Similarly, *P* value demonstrated the significant difference of OS rate between patients with FASN(+) and patients with FASN(-).

<sup>c</sup>Furthermore, we divided 122 NPC patients into 4 groups according to both FZD10 and FASN expressions, namely patients with FASN(-)FZD10 (-), patients with FASN(+)FZD10(-), patients with FASN(-)FZD10(+) and patients with FZD10(-). *P* value represented the significant difference of OS rate among these 4 groups. Additionally, in contrast to FASN(-)FZD(-), OS was obviously worse in FASN(+)FZD10(-), FASN(-)FZD10(+), and FASN(+)FZD10(-), indicated by <sup>d</sup>*P*, <sup>e</sup>*P*, and <sup>f</sup>*P* respectively.

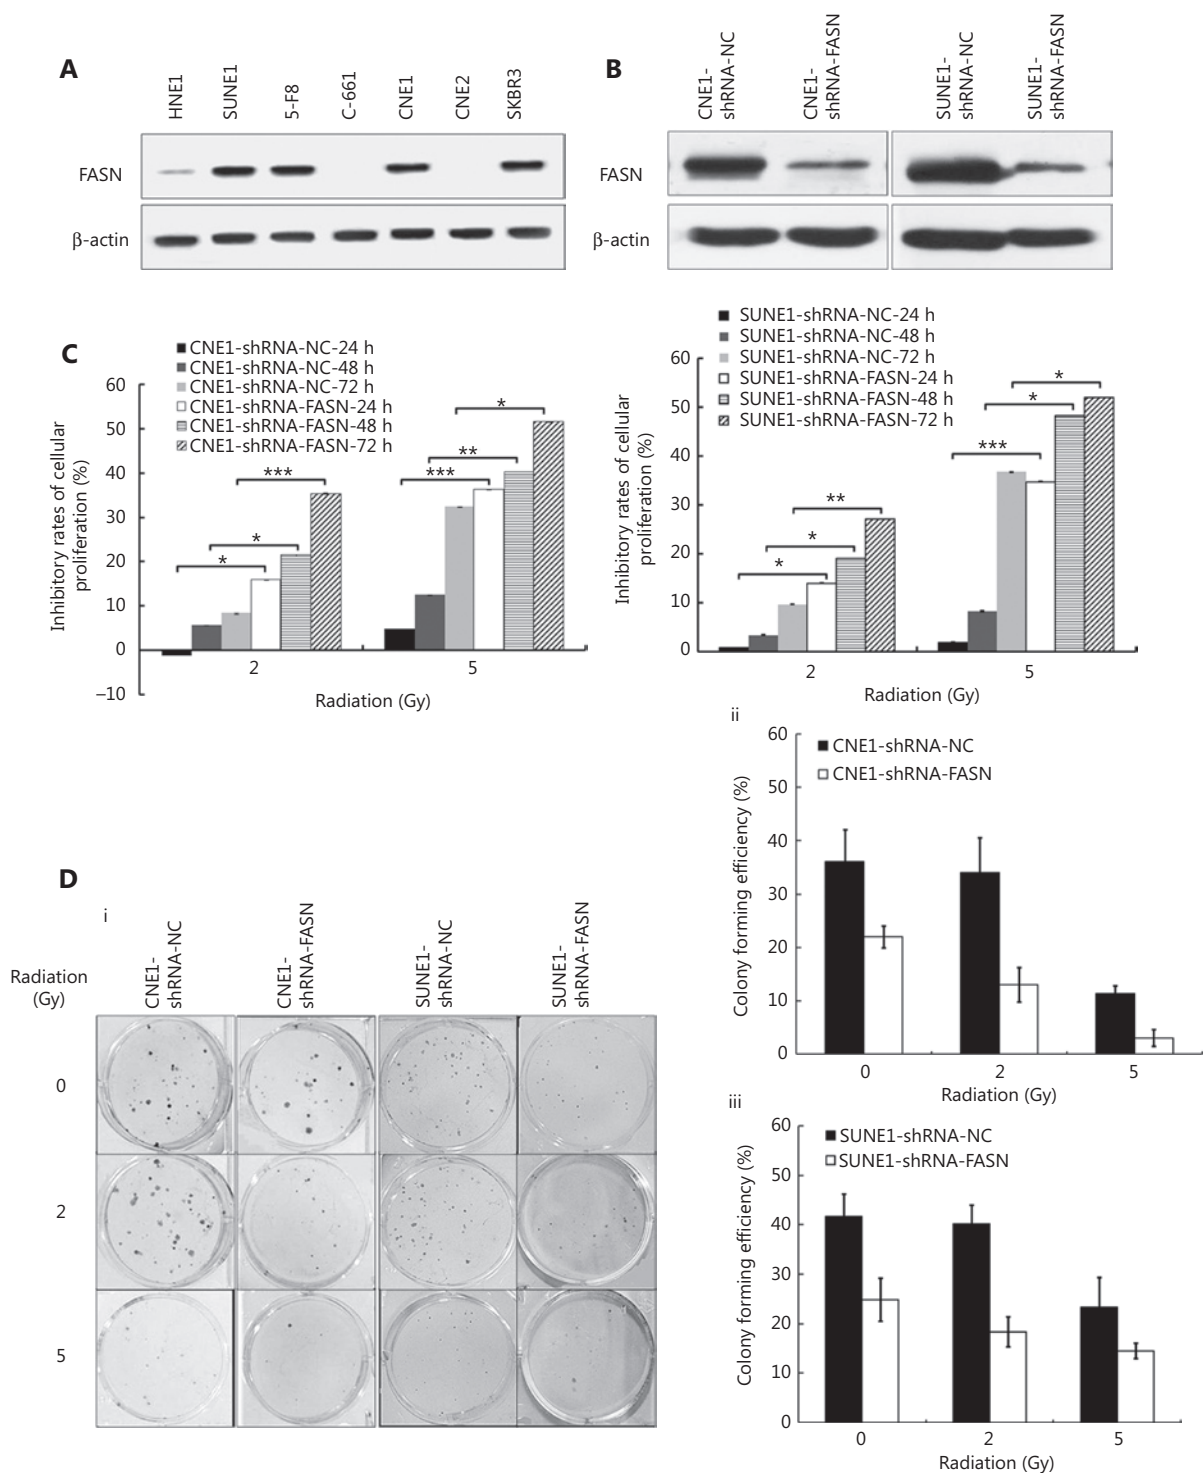

**Figure S1** Fatty acid synthase (FASN) knockdown sensitizes nasopharyngeal carcinoma cells to radiation. (A) Expression profile of FASN in different cancer cell lines as determined using WB.  $\beta$ -Actin was used as a loading control. (B) WB analysis of FASN knockdown in CNE1 and SUNE1 cells. (C, D) Effect of FASN knockdown on radiation-induced inhibition of proliferation of CNE1 (left panel) and SUNE1 (right panel) cells as determined using MTT (C) and colony formation (D) assays ( $*P < 0.05$ ;  $**P < 0.01$ ;  $***P < 0.001$ ).

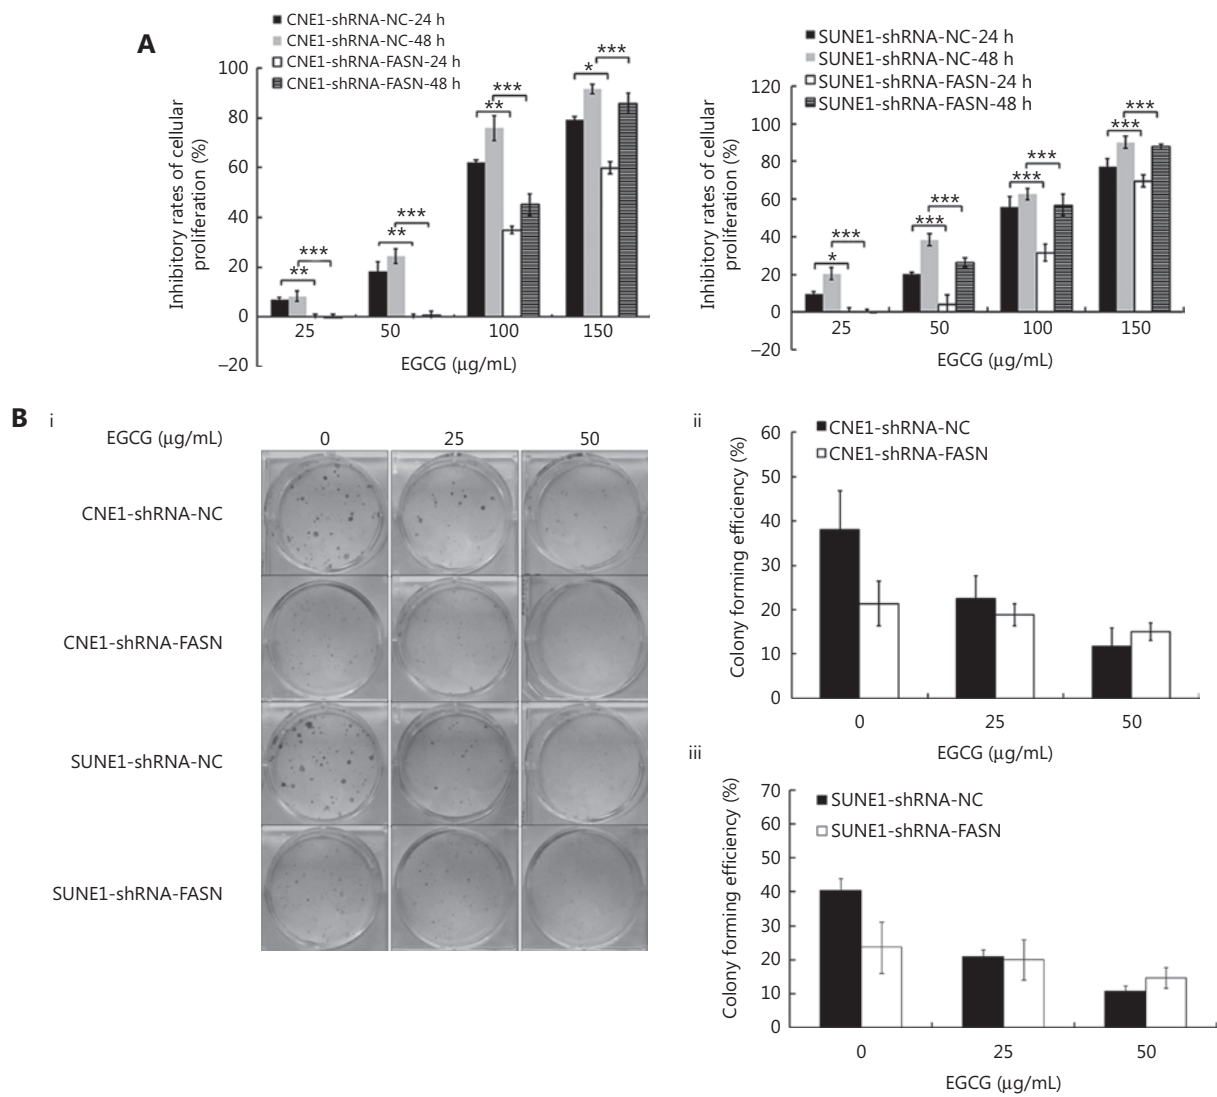

**Figure S2** Epigallocatechin gallate at low concentration is selective to fatty acid synthase (FASN) in nasopharyngeal carcinoma cells. The effect of epigallocatechin gallate on proliferation of CNE1 and SUNE1 cells following FASN knockdown was tested using the MTT assay (A) and colony formation (B) assays at different concentrations and at different time points. \* $P < 0.05$ ; \*\* $P < 0.01$ ; \*\*\* $P < 0.001$ .
